# Supplementary material
Source: Springer Nature journal article supplement (https://www.springermedizin.de/resource/supplementary/12913_2013_3069_MOESM2_ESM.pdf/9532340)
Supplement: MOESM2 [file 9532340]

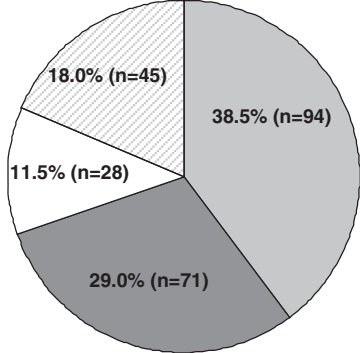

- Next major hospital reached within 15 minutes per car
- Next major hospital reached within 30 minutes per car
- Next major hospital reached within 45 minutes per car
- Next major hospital reached within more than 45 minutes per car
